# Supplementary material for: Expanding the cultivated human archaeome by targeted isolation of novel Methanobrevibacter strains from fecal samples
Source: Research Square preprint supplement (doi:10.21203/rs.3.rs-4250821/v1), 2024-04-19
Supplement: Supplementary file 1 [file 48f2e85b36e6f1666d802c28.xlsx]

## Sheet: Overview
Supplementary Table S1: Overview of the 16 recruited participants and their metadata
Supplementary Table S2: Overview of inclusion and exclusion criteria for participant recruitment
Supplementary Table S3: Composition of enrichment cultures after antibiotics and lysozyme treatments
Supplementary Table S4: Spearman correlations of co-cultured archaea and bacteria
Supplementary Table S5: Recovered genomes, their classification according to GTDB, completeness and contamination.
Supplementary Table S6: List of Methanobrevibacter genomes
Supplementary Table S7: ANI Matrix
Supplementary Table S8: ANI distances from different clusters to themselves and Candidatus M. intestini (CMI, WWM1085) and M. smithii (MS, DSM2374).
Supplementary Table S9: Kbase annotation output on CRISPR Functions for M. smithii (left table) and Cand. M. intestini (right table)
Supplementary Table S10: Genomic and functional annotation of genes divergent in Methanobrevibacter genomes from diseased and healthy individuals

## Sheet: Supplementary Table S1
Supplementary Table S1: Overview of the 16 recruited participants and their metadata
Participant	CH4 level [ppm]	Disorder	Sex	Date of sample received
P31	70	None	M	2021-03-09
P32	44	None	M	2021-03-24
P15	30	None	F	2021-04-15
P51	28	None	M	2021-03-26
P82	22	None	F	2021-06-10
P46	21	None	M	2021-03-23
P20	17	None	F	2021-03-16
P45	16	None	F	2021-03-24
P66	55	Fructose intolerance	F	2021-05-05
P48	26	Irritable bowel syndrome	F	2021-03-26
P34	22	Pain, Crohn's disease, flatulence	F	2021-03-09
P61	21	Irritable bowel syndrome, lactose intolerance, SIBO	F	2021-06-21
P86	13	Lactose intolerance	M	2021-11-16
P89	10	Irritable bowel syndrome, lactose intolerance, pancreatic inflammation	F	2021-11-16
P88	8	Irritable bowel syndrome, lactose intolerance, fructose intolerance	F	2021-11-12
P85	6	Crohn's disease	M	2021-11-21

## Sheet: Supplementary Table S2
Supplementary Table S2: Overview of inclusion and exclusion criteria for participant recruitment
Inclusion criteria
Diseased participants
Signed declaration of consent
Diagnosed gastrointestinal disorder
Healthy participants
Signed declaration of consent
No gastrointestinal infection in the last three months
No gastrointestinal resection (except appendectomy)
Methane over producers (MOP)
The methane level in the breath test is higher than 5ppm
Exclusion criteria
No BMI higher than 30
Not younger than 18 years old
No coloscopy in the last three months
No antibiotics intake in the last month
No probiotics intake in the last month
No trip abroad outside of Europe in the last month
No long term medication

## Sheet: Supplementary Table S3
Supplementary Table S3: Composition of enrichment cultures after antibiotics and lysozyme treatments
Taxa	P82MpT1_sans_C	DSP32_MS_Bt	DSP86_MS_Bt	DSP86_MS_sans_C
Methanobrevibacter_A smithii	0.01237	0.95025	0.01345	0.69078
Methanobrevibacter_A smithii_A	0.3666	0.03077	0.98401	0.01551
Escherichia coli_D	0.33611	0	0	0
Parabacteroides distasonis	0	0	0	0.2847
Bacteroides cellulosilyticus	0.08666	0	0	0
Bacteroides thetaiotaomicron	0.06306	0	0	0
Bacteroides fragilis	0.04639	0	0	0
Bacteroides ovatus	0.01972	0	0	0
Eggerthella lenta	0.0163	0	0	0
UMGS1663 sp900753245	0	0.01294	0.00254	0
Finegoldia magna_H	0.01166	0	0	0
Escherichia fergusonii	0.00623	0	0	0
F0422 sp003999875	0.0053	0	0	0
UMGS75 sp900538885	0	0.00499	0	0
CAG-269 sp900556945	0.00458	0	0	0
MGYG000002209	0	0	0	0.00454
Alistipes onderdonkii	0.00362	0	0	0
Atopobium minutum	0.00311	0	0	0
Bacteroides xylanisolvens	0.00277	0	0	0
MGYG000002717	0.00255	0	0	0
Citrobacter_B koseri	0.0025	0	0	0
Odoribacter sp900548135	0	0	0	0.00233
Parabacteroides merdae	0	0	0	0.00213
Bacteroides faecis	0.00183	0	0	0
Bacteroides fragilis_A	0.00182	0	0	0
Robinsoniella sp900539655	0.00172	0	0	0
Bacteroides sp900761785	0.0015	0	0	0
Escherichia albertii	0.00136	0	0	0
Bacteroides acidifaciens	0.00117	0	0	0
Providencia rettgeri	0.001	0	0	0
MGYG000004303	0	0.00061	0	0
MGYG000001195	0	0.00042	0	0

## Sheet: Supplementary Table S4
Supplementary Table S4: Spearman correlations of co-cultured archaea and bacteria
p-values
	Atopobium minutum	Bacteroides acidifaciens	Bacteroides cellulosilyticus	Bacteroides fragilis	Bacteroides ovatus	Bacteroides salyersiae	Bacteroides sp900765785	Bacteroides sp902362375	Bacteroides thetaiotaomicron	Bacteroides uniformis	Bacteroides xylanisolvens	CAG-269 sp900556945	Citrobacter_B koseri	Eggerthella lenta	Escherichia albertii	Escherichia coli_D	Escherichia fergusonii	Eubacterium callanderi	F0422 sp003999875	Finegoldia magna_H	Gordonibacter pamelaeae	HGM11788 sp900760465	Methanobrevibacter smithii	Cand. M. intestini	MGYG000001195	MGYG000002717	Parabacteroides distasonis	Phocaeicola dorei	Prevotella lascolaii	Providencia rettgeri	Robinsoniella sp900539655	UMGS1663 sp900753245	UMGS75 sp900538885
Atopobium minutum	NA	0.0817407	0.0652382	0.000491275	0.00819379	0.0452405	0.0817407	0.0817407	0.000858736	0.000207757	0.0817407	0.0174087	0.000207757	0.327672	0.000207757	0.0444521	0.0269147	0.00423573	0.0298537	0.000207757	0.965081	0.0817407	0.522694	0.716846	0.571427	0.0817407	0.3203	0.863265	0.0452405	0.000207757	0.000207757	0.0101243	0.287414
Bacteroides acidifaciens	0.0817407	NA	0.0571255	0.102871	4.1106e-06	0.683522	0	0	0.0046745	0.616387	0	0.0847009	0.616387	0.0147813	0.616387	0.047135	0.0598553	2.904e-07	0.138837	0.616387	0.389944	0	0.879954	0.0723519	0.101204	0	0.28564	0.0201119	0.683522	0.616387	0.616387	0.0999436	0.296241
Bacteroides cellulosilyticus	0.0652382	0.0571255	NA	0.0295079	0.932185	0.00529333	0.0571255	0.0571255	0.0130414	3.25863e-05	0.0571255	0.109416	3.25863e-05	0.877228	3.25863e-05	0	0	0.0042747	0	3.25863e-05	0.000215327	0.0571255	4.339e-07	0.000502848	0.914385	0.0571255	0.769721	0.00231818	0.00529333	3.25863e-05	3.25863e-05	0.865722	1.63385e-05
Bacteroides fragilis	0.000491275	0.102871	0.0295079	NA	0.0101663	0.131204	0.102871	0.102871	7e-10	2e-09	0.102871	6e-10	2e-09	0.00141415	2e-09	0.0196007	0.0203012	0.146329	0.00192039	2e-09	0.998399	0.102871	0.254051	0.348844	0.0347919	0.102871	0.00493435	0.770046	0.131204	2e-09	2e-09	0.622881	0.929599
Bacteroides ovatus	0.00819379	4.1106e-06	0.932185	0.0101663	NA	0.139394	4.1106e-06	4.1106e-06	6.76426e-05	0.324633	4.1106e-06	0.00504638	0.324633	0.702151	0.324633	0.765892	0.91058	0.000469704	0.811028	0.324633	0.0156336	4.1106e-06	0.0726734	0.00155055	0.273191	4.1106e-06	0.94636	0.694303	0.139394	0.324633	0.324633	0.284389	0.000433433
Bacteroides salyersiae	0.0452405	0.683522	0.00529333	0.131204	0.139394	NA	0.683522	0.683522	0.16012	0.0530088	0.683522	0.0430881	0.0530088	0.559695	0.0530088	0.00562899	0.0118252	0.653837	0.0033838	0.0530088	0.118509	0.683522	0.00616959	0.00105458	0.065682	0.683522	0.00145151	0.00175596	0	0.0530088	0.0530088	0.0061715	0.0014601
Bacteroides sp900765785	0.0817407	0	0.0571255	0.102871	4.1106e-06	0.683522	NA	0	0.0046745	0.616387	0	0.0847009	0.616387	0.0147813	0.616387	0.047135	0.0598553	2.904e-07	0.138837	0.616387	0.389944	0	0.879954	0.0723519	0.101204	0	0.28564	0.0201119	0.683522	0.616387	0.616387	0.0999436	0.296241
Bacteroides sp902362375	0.0817407	0	0.0571255	0.102871	4.1106e-06	0.683522	0	NA	0.0046745	0.616387	0	0.0847009	0.616387	0.0147813	0.616387	0.047135	0.0598553	2.904e-07	0.138837	0.616387	0.389944	0	0.879954	0.0723519	0.101204	0	0.28564	0.0201119	0.683522	0.616387	0.616387	0.0999436	0.296241
Bacteroides thetaiotaomicron	0.000858736	0.0046745	0.0130414	7e-10	6.76426e-05	0.16012	0.0046745	0.0046745	NA	3.816e-07	0.0046745	7.2e-09	3.816e-07	0.0239258	3.816e-07	0.00471047	0.00590775	0.00920841	0.00820187	3.816e-07	0.552006	0.0046745	0.0941471	0.445555	0.0743187	0.0046745	0.0433321	0.274549	0.16012	3.816e-07	3.816e-07	0.769011	0.965552
Bacteroides uniformis	0.000207757	0.616387	3.25863e-05	2e-09	0.324633	0.0530088	0.616387	0.616387	3.816e-07	NA	0.616387	7.061e-07	0	0.000422009	0	5.37359e-05	2.63213e-05	0.188749	3.733e-07	0	0.0645557	0.616387	0.00103924	0.00278986	0.571127	0.616387	0.0438956	0.446283	0.0530088	0	0	0.48898	0.0733311
Bacteroides xylanisolvens	0.0817407	0	0.0571255	0.102871	4.1106e-06	0.683522	0	0	0.0046745	0.616387	NA	0.0847009	0.616387	0.0147813	0.616387	0.047135	0.0598553	2.904e-07	0.138837	0.616387	0.389944	0	0.879954	0.0723519	0.101204	0	0.28564	0.0201119	0.683522	0.616387	0.616387	0.0999436	0.296241
CAG-269 sp900556945	0.0174087	0.0847009	0.109416	6e-10	0.00504638	0.0430881	0.0847009	0.0847009	7.2e-09	7.061e-07	0.0847009	NA	7.061e-07	0.000502069	7.061e-07	0.0363358	0.0959682	0.43514	0.0193833	7.061e-07	0.33474	0.0847009	0.407446	0.250035	0.0560268	0.0847009	0.000714489	0.995996	0.0430881	7.061e-07	7.061e-07	0.0365817	0.511188
Citrobacter_B koseri	0.000207757	0.616387	3.25863e-05	2e-09	0.324633	0.0530088	0.616387	0.616387	3.816e-07	0	0.616387	7.061e-07	NA	0.000422009	0	5.37359e-05	2.63213e-05	0.188749	3.733e-07	0	0.0645557	0.616387	0.00103924	0.00278986	0.571127	0.616387	0.0438956	0.446283	0.0530088	0	0	0.48898	0.0733311
Eggerthella lenta	0.327672	0.0147813	0.877228	0.00141415	0.702151	0.559695	0.0147813	0.0147813	0.0239258	0.000422009	0.0147813	0.000502069	0.000422009	NA	0.000422009	0.982274	0.845901	0.0377215	0.413334	0.000422009	0.720521	0.0147813	0.452367	0.0231141	0.970804	0.0147813	0.00160343	0.00549216	0.559695	0.000422009	0.000422009	0.00421733	0.963748
Escherichia albertii	0.000207757	0.616387	3.25863e-05	2e-09	0.324633	0.0530088	0.616387	0.616387	3.816e-07	0	0.616387	7.061e-07	0	0.000422009	NA	5.37359e-05	2.63213e-05	0.188749	3.733e-07	0	0.0645557	0.616387	0.00103924	0.00278986	0.571127	0.616387	0.0438956	0.446283	0.0530088	0	0	0.48898	0.0733311
Escherichia coli_D	0.0444521	0.047135	0	0.0196007	0.765892	0.00562899	0.047135	0.047135	0.00471047	5.37359e-05	0.047135	0.0363358	5.37359e-05	0.982274	5.37359e-05	NA	0	0.015386	0	5.37359e-05	0.00237512	0.047135	7e-09	0.000488668	0.19961	0.047135	0.551232	0.000564598	0.00562899	5.37359e-05	5.37359e-05	0.769327	0.000262384
Escherichia fergusonii	0.0269147	0.0598553	0	0.0203012	0.91058	0.0118252	0.0598553	0.0598553	0.00590775	2.63213e-05	0.0598553	0.0959682	2.63213e-05	0.845901	2.63213e-05	0	NA	0.00681583	0	2.63213e-05	0.000887375	0.0598553	7.7e-09	0.000736928	0.415481	0.0598553	0.926801	0.00278646	0.0118252	2.63213e-05	2.63213e-05	0.690515	6.97623e-05
Eubacterium callanderi	0.00423573	2.904e-07	0.0042747	0.146329	0.000469704	0.653837	2.904e-07	2.904e-07	0.00920841	0.188749	2.904e-07	0.43514	0.188749	0.0377215	0.188749	0.015386	0.00681583	NA	0.0262601	0.188749	0.958367	2.904e-07	0.740153	0.211607	0.943144	2.904e-07	0.021044	0.0737448	0.653837	0.188749	0.188749	0.0376974	0.774174
F0422 sp003999875	0.0298537	0.138837	0	0.00192039	0.811028	0.0033838	0.138837	0.138837	0.00820187	3.733e-07	0.138837	0.0193833	3.733e-07	0.413334	3.733e-07	0	0	0.0262601	NA	3.733e-07	0.000226409	0.138837	3.655e-07	0.000168479	0.644117	0.138837	0.627204	0.0127071	0.0033838	3.733e-07	3.733e-07	0.835792	9.47456e-05
Finegoldia magna_H	0.000207757	0.616387	3.25863e-05	2e-09	0.324633	0.0530088	0.616387	0.616387	3.816e-07	0	0.616387	7.061e-07	0	0.000422009	0	5.37359e-05	2.63213e-05	0.188749	3.733e-07	NA	0.0645557	0.616387	0.00103924	0.00278986	0.571127	0.616387	0.0438956	0.446283	0.0530088	0	0	0.48898	0.0733311
Gordonibacter pamelaeae	0.965081	0.389944	0.000215327	0.998399	0.0156336	0.118509	0.389944	0.389944	0.552006	0.0645557	0.389944	0.33474	0.0645557	0.720521	0.0645557	0.00237512	0.000887375	0.958367	0.000226409	0.0645557	NA	0.389944	3.7141e-06	0.00142816	0.171451	0.389944	0.513942	0.325161	0.118509	0.0645557	0.0645557	0.529806	6.925e-07
HGM11788 sp900760465	0.0817407	0	0.0571255	0.102871	4.1106e-06	0.683522	0	0	0.0046745	0.616387	0	0.0847009	0.616387	0.0147813	0.616387	0.047135	0.0598553	2.904e-07	0.138837	0.616387	0.389944	NA	0.879954	0.0723519	0.101204	0	0.28564	0.0201119	0.683522	0.616387	0.616387	0.0999436	0.296241
Methanobrevibacter smithii	0.522694	0.879954	4.339e-07	0.254051	0.0726734	0.00616959	0.879954	0.879954	0.0941471	0.00103924	0.879954	0.407446	0.00103924	0.452367	0.00103924	7e-09	7.7e-09	0.740153	3.655e-07	0.00103924	3.7141e-06	0.879954	NA	1.9e-08	0.787211	0.879954	0.66525	0.00785186	0.00616959	0.00103924	0.00103924	0.981316	1e-10
Cand. M. intestini	0.716846	0.0723519	0.000502848	0.348844	0.00155055	0.00105458	0.0723519	0.0723519	0.445555	0.00278986	0.0723519	0.250035	0.00278986	0.0231141	0.00278986	0.000488668	0.000736928	0.211607	0.000168479	0.00278986	0.00142816	0.0723519	1.9e-08	NA	0.417531	0.0723519	0.293107	0.160161	0.00105458	0.00278986	0.00278986	0.0460927	8.8e-09
MGYG000001195	0.571427	0.101204	0.914385	0.0347919	0.273191	0.065682	0.101204	0.101204	0.0743187	0.571127	0.101204	0.0560268	0.571127	0.970804	0.571127	0.19961	0.415481	0.943144	0.644117	0.571127	0.171451	0.101204	0.787211	0.417531	NA	0.101204	0.0149915	0.11354	0.065682	0.571127	0.571127	0.792246	0.434111
MGYG000002717	0.0817407	0	0.0571255	0.102871	4.1106e-06	0.683522	0	0	0.0046745	0.616387	0	0.0847009	0.616387	0.0147813	0.616387	0.047135	0.0598553	2.904e-07	0.138837	0.616387	0.389944	0	0.879954	0.0723519	0.101204	NA	0.28564	0.0201119	0.683522	0.616387	0.616387	0.0999436	0.296241
Parabacteroides distasonis	0.3203	0.28564	0.769721	0.00493435	0.94636	0.00145151	0.28564	0.28564	0.0433321	0.0438956	0.28564	0.000714489	0.0438956	0.00160343	0.0438956	0.551232	0.926801	0.021044	0.627204	0.0438956	0.513942	0.28564	0.66525	0.293107	0.0149915	0.28564	NA	0.839957	0.00145151	0.0438956	0.0438956	0.00849631	0.812265
Phocaeicola dorei	0.863265	0.0201119	0.00231818	0.770046	0.694303	0.00175596	0.0201119	0.0201119	0.274549	0.446283	0.0201119	0.995996	0.446283	0.00549216	0.446283	0.000564598	0.00278646	0.0737448	0.0127071	0.446283	0.325161	0.0201119	0.00785186	0.160161	0.11354	0.0201119	0.839957	NA	0.00175596	0.446283	0.446283	0.327677	0.0109291
Prevotella lascolaii	0.0452405	0.683522	0.00529333	0.131204	0.139394	0	0.683522	0.683522	0.16012	0.0530088	0.683522	0.0430881	0.0530088	0.559695	0.0530088	0.00562899	0.0118252	0.653837	0.0033838	0.0530088	0.118509	0.683522	0.00616959	0.00105458	0.065682	0.683522	0.00145151	0.00175596	NA	0.0530088	0.0530088	0.0061715	0.0014601
Providencia rettgeri	0.000207757	0.616387	3.25863e-05	2e-09	0.324633	0.0530088	0.616387	0.616387	3.816e-07	0	0.616387	7.061e-07	0	0.000422009	0	5.37359e-05	2.63213e-05	0.188749	3.733e-07	0	0.0645557	0.616387	0.00103924	0.00278986	0.571127	0.616387	0.0438956	0.446283	0.0530088	NA	0	0.48898	0.0733311
Robinsoniella sp900539655	0.000207757	0.616387	3.25863e-05	2e-09	0.324633	0.0530088	0.616387	0.616387	3.816e-07	0	0.616387	7.061e-07	0	0.000422009	0	5.37359e-05	2.63213e-05	0.188749	3.733e-07	0	0.0645557	0.616387	0.00103924	0.00278986	0.571127	0.616387	0.0438956	0.446283	0.0530088	0	NA	0.48898	0.0733311
UMGS1663 sp900753245	0.0101243	0.0999436	0.865722	0.622881	0.284389	0.0061715	0.0999436	0.0999436	0.769011	0.48898	0.0999436	0.0365817	0.48898	0.00421733	0.48898	0.769327	0.690515	0.0376974	0.835792	0.48898	0.529806	0.0999436	0.981316	0.0460927	0.792246	0.0999436	0.00849631	0.327677	0.0061715	0.48898	0.48898	NA	0.72821
UMGS75 sp900538885	0.287414	0.296241	1.63385e-05	0.929599	0.000433433	0.0014601	0.296241	0.296241	0.965552	0.0733311	0.296241	0.511188	0.0733311	0.963748	0.0733311	0.000262384	6.97623e-05	0.774174	9.47456e-05	0.0733311	6.925e-07	0.296241	1e-10	8.8e-09	0.434111	0.296241	0.812265	0.0109291	0.0014601	0.0733311	0.0733311	0.72821	NA
q-values
	Atopobium minutum	Bacteroides acidifaciens	Bacteroides cellulosilyticus	Bacteroides fragilis	Bacteroides ovatus	Bacteroides salyersiae	Bacteroides sp900765785	Bacteroides sp902362375	Bacteroides thetaiotaomicron	Bacteroides uniformis	Bacteroides xylanisolvens	CAG-269 sp900556945	Citrobacter_B koseri	Eggerthella lenta	Escherichia albertii	Escherichia coli_D	Escherichia fergusonii	Eubacterium callanderi	F0422 sp003999875	Finegoldia magna_H	Gordonibacter pamelaeae	HGM11788 sp900760465	Methanobrevibacter smithii	Cand. M. intestini	MGYG000001195	MGYG000002717	Parabacteroides distasonis	Phocaeicola dorei	Prevotella lascolaii	Providencia rettgeri	Robinsoniella sp900539655	UMGS1663 sp900753245	UMGS75 sp900538885
Atopobium minutum	NA	0.141971	0.122545	0.00204247	0.0227926	0.0987065	0.141971	0.141971	0.00340912	0.000962241	0.141971	0.0439798	0.000962241	0.448221	0.000962241	0.0977946	0.0637263	0.0134727	0.0700567	0.000962241	0.974783	0.141971	0.661829	0.777197	0.699897	0.141971	0.447097	0.904373	0.0987065	0.000962241	0.000962241	0.0276691	0.411259
Bacteroides acidifaciens	0.141971	NA	0.112546	0.164594	2.55341e-05	0.747205	0	0	0.0142667	0.699897	0	0.144265	0.699897	0.0380708	0.699897	0.0999489	0.115342	2.69002e-06	0.213954	0.699897	0.522565	0	0.907453	0.130807	0.164594	0	0.409831	0.0489359	0.747205	0.699897	0.699897	0.164594	0.415999
Bacteroides cellulosilyticus	0.122545	0.112546	NA	0.0695542	0.952019	0.0157016	0.112546	0.112546	0.0346024	0.000175567	0.112546	0.174537	0.000175567	0.907453	0.000175567	0	0	0.0135152	0	0.000175567	0.000988629	0.112546	3.22675e-06	0.00205817	0.939291	0.112546	0.821383	0.00794804	0.0157016	0.000175567	0.000175567	0.905151	0.000100311
Bacteroides fragilis	0.00204247	0.164594	0.0695542	NA	0.0276691	0.206177	0.164594	0.164594	9.24e-09	2.29565e-08	0.164594	8.12308e-09	2.29565e-08	0.00520901	2.29565e-08	0.0489359	0.0491698	0.223947	0.00662724	2.29565e-08	0.998399	0.164594	0.373647	0.474716	0.0812838	0.164594	0.0148876	0.821383	0.206177	2.29565e-08	2.29565e-08	0.705753	0.951218
Bacteroides ovatus	0.0227926	2.55341e-05	0.952019	0.0276691	NA	0.213954	2.55341e-05	2.55341e-05	0.000340146	0.447097	2.55341e-05	0.0151391	0.447097	0.762831	0.447097	0.821383	0.937205	0.00198403	0.857752	0.447097	0.0396854	2.55341e-05	0.130807	0.00549457	0.40068	2.55341e-05	0.962771	0.755859	0.213954	0.447097	0.447097	0.409831	0.00184558
Bacteroides salyersiae	0.0987065	0.747205	0.0157016	0.206177	0.213954	NA	0.747205	0.747205	0.243002	0.107236	0.747205	0.0969743	0.107236	0.699897	0.107236	0.0164205	0.0316939	0.734523	0.0108942	0.107236	0.187343	0.747205	0.0175191	0.00392127	0.122545	0.747205	0.00520901	0.00609966	0	0.107236	0.107236	0.0175191	0.00520901
Bacteroides sp900765785	0.141971	0	0.112546	0.164594	2.55341e-05	0.747205	NA	0	0.0142667	0.699897	0	0.144265	0.699897	0.0380708	0.699897	0.0999489	0.115342	2.69002e-06	0.213954	0.699897	0.522565	0	0.907453	0.130807	0.164594	0	0.409831	0.0489359	0.747205	0.699897	0.699897	0.164594	0.415999
Bacteroides sp902362375	0.141971	0	0.112546	0.164594	2.55341e-05	0.747205	0	NA	0.0142667	0.699897	0	0.144265	0.699897	0.0380708	0.699897	0.0999489	0.115342	2.69002e-06	0.213954	0.699897	0.522565	0	0.907453	0.130807	0.164594	0	0.409831	0.0489359	0.747205	0.699897	0.699897	0.164594	0.415999
Bacteroides thetaiotaomicron	0.00340912	0.0142667	0.0346024	9.24e-09	0.000340146	0.243002	0.0142667	0.0142667	NA	2.87835e-06	0.0142667	7.92e-08	2.87835e-06	0.0571621	2.87835e-06	0.0142938	0.017139	0.0253231	0.0227926	2.87835e-06	0.69395	0.0142667	0.159838	0.578962	0.131679	0.0142667	0.0969743	0.401557	0.243002	2.87835e-06	2.87835e-06	0.821383	0.974783
Bacteroides uniformis	0.000962241	0.699897	0.000175567	2.29565e-08	0.447097	0.107236	0.699897	0.699897	2.87835e-06	NA	0.699897	4.77975e-06	0	0.00181155	0	0.000272813	0.000151061	0.280731	2.87835e-06	0	0.121734	0.699897	0.00391941	0.00909288	0.699897	0.699897	0.0969743	0.578962	0.107236	0	0	0.623627	0.130807
Bacteroides xylanisolvens	0.141971	0	0.112546	0.164594	2.55341e-05	0.747205	0	0	0.0142667	0.699897	NA	0.144265	0.699897	0.0380708	0.699897	0.0999489	0.115342	2.69002e-06	0.213954	0.699897	0.522565	0	0.907453	0.130807	0.164594	0	0.409831	0.0489359	0.747205	0.699897	0.699897	0.164594	0.415999
CAG-269 sp900556945	0.0439798	0.144265	0.174537	8.12308e-09	0.0151391	0.0969743	0.144265	0.144265	7.92e-08	4.77975e-06	0.144265	NA	4.77975e-06	0.00205817	4.77975e-06	0.0845167	0.162408	0.574385	0.0487352	4.77975e-06	0.4567	0.144265	0.544637	0.368767	0.112546	0.144265	0.00287977	0.997886	0.0969743	4.77975e-06	4.77975e-06	0.0847156	0.650379
Citrobacter_B koseri	0.000962241	0.699897	0.000175567	2.29565e-08	0.447097	0.107236	0.699897	0.699897	2.87835e-06	0	0.699897	4.77975e-06	NA	0.00181155	0	0.000272813	0.000151061	0.280731	2.87835e-06	0	0.121734	0.699897	0.00391941	0.00909288	0.699897	0.699897	0.0969743	0.578962	0.107236	0	0	0.623627	0.130807
Eggerthella lenta	0.448221	0.0380708	0.907453	0.00520901	0.762831	0.699897	0.0380708	0.0380708	0.0571621	0.00181155	0.0380708	0.00205817	0.00181155	NA	0.00181155	0.986009	0.887944	0.0865955	0.551113	0.00181155	0.77958	0.0380708	0.585416	0.0554738	0.978215	0.0380708	0.00564406	0.0162003	0.699897	0.00181155	0.00181155	0.0134727	0.974783
Escherichia albertii	0.000962241	0.699897	0.000175567	2.29565e-08	0.447097	0.107236	0.699897	0.699897	2.87835e-06	0	0.699897	4.77975e-06	0	0.00181155	NA	0.000272813	0.000151061	0.280731	2.87835e-06	0	0.121734	0.699897	0.00391941	0.00909288	0.699897	0.699897	0.0969743	0.578962	0.107236	0	0	0.623627	0.130807
Escherichia coli_D	0.0977946	0.0999489	0	0.0489359	0.821383	0.0164205	0.0999489	0.0999489	0.0142938	0.000272813	0.0999489	0.0845167	0.000272813	0.986009	0.000272813	NA	0	0.0392456	0	0.000272813	0.00809072	0.0999489	7.86383e-08	0.00204247	0.296051	0.0999489	0.69395	0.00229314	0.0164205	0.000272813	0.000272813	0.821383	0.00118409
Escherichia fergusonii	0.0637263	0.115342	0	0.0491698	0.937205	0.0316939	0.115342	0.115342	0.017139	0.000151061	0.115342	0.162408	0.000151061	0.887944	0.000151061	0	NA	0.0192447	0	0.000151061	0.00349652	0.115342	8.29714e-08	0.00294771	0.552579	0.115342	0.950196	0.00909288	0.0316939	0.000151061	0.000151061	0.753289	0.000347495
Eubacterium callanderi	0.0134727	2.69002e-06	0.0135152	0.223947	0.00198403	0.734523	2.69002e-06	2.69002e-06	0.0253231	0.280731	2.69002e-06	0.574385	0.280731	0.0865955	0.280731	0.0392456	0.0192447	NA	0.0624564	0.280731	0.973111	2.69002e-06	0.797553	0.312965	0.961352	2.69002e-06	0.0507361	0.131102	0.734523	0.280731	0.280731	0.0865955	0.824121
F0422 sp003999875	0.0700567	0.213954	0	0.00662724	0.857752	0.0108942	0.213954	0.213954	0.0227926	2.87835e-06	0.213954	0.0487352	2.87835e-06	0.551113	2.87835e-06	0	0	0.0624564	NA	2.87835e-06	0.00103055	0.213954	2.87835e-06	0.000823674	0.726696	0.213954	0.70913	0.0338857	0.0108942	2.87835e-06	2.87835e-06	0.880835	0.00046753
Finegoldia magna_H	0.000962241	0.699897	0.000175567	2.29565e-08	0.447097	0.107236	0.699897	0.699897	2.87835e-06	0	0.699897	4.77975e-06	0	0.00181155	0	0.000272813	0.000151061	0.280731	2.87835e-06	NA	0.121734	0.699897	0.00391941	0.00909288	0.699897	0.699897	0.0969743	0.578962	0.107236	0	0	0.623627	0.130807
Gordonibacter pamelaeae	0.974783	0.522565	0.000988629	0.998399	0.0396854	0.187343	0.522565	0.522565	0.69395	0.121734	0.522565	0.4567	0.121734	0.77958	0.121734	0.00809072	0.00349652	0.973111	0.00103055	0.121734	NA	0.522565	2.48234e-05	0.00520901	0.259387	0.522565	0.652311	0.447097	0.187343	0.121734	0.121734	0.669228	4.77975e-06
HGM11788 sp900760465	0.141971	0	0.112546	0.164594	2.55341e-05	0.747205	0	0	0.0142667	0.699897	0	0.144265	0.699897	0.0380708	0.699897	0.0999489	0.115342	2.69002e-06	0.213954	0.699897	0.522565	NA	0.907453	0.130807	0.164594	0	0.409831	0.0489359	0.747205	0.699897	0.699897	0.164594	0.415999
Methanobrevibacter smithii	0.661829	0.907453	3.22675e-06	0.373647	0.130807	0.0175191	0.907453	0.907453	0.159838	0.00391941	0.907453	0.544637	0.00391941	0.585416	0.00391941	7.86383e-08	8.29714e-08	0.797553	2.87835e-06	0.00391941	2.48234e-05	0.907453	NA	1.96706e-07	0.836313	0.907453	0.745758	0.022052	0.0175191	0.00391941	0.00391941	0.986009	1.38947e-09
Cand. M. intestini	0.777197	0.130807	0.00205817	0.474716	0.00549457	0.00392127	0.130807	0.130807	0.578962	0.00909288	0.130807	0.368767	0.00909288	0.0554738	0.00909288	0.00204247	0.00294771	0.312965	0.000823674	0.00909288	0.00520901	0.130807	1.96706e-07	NA	0.553911	0.130807	0.415999	0.243002	0.00392127	0.00909288	0.00909288	0.0999489	9.2928e-08
MGYG000001195	0.699897	0.164594	0.939291	0.0812838	0.40068	0.122545	0.164594	0.164594	0.131679	0.699897	0.164594	0.112546	0.699897	0.978215	0.699897	0.296051	0.552579	0.961352	0.726696	0.699897	0.259387	0.164594	0.836313	0.553911	NA	0.164594	0.0384247	0.180569	0.122545	0.699897	0.699897	0.839972	0.574385
MGYG000002717	0.141971	0	0.112546	0.164594	2.55341e-05	0.747205	0	0	0.0142667	0.699897	0	0.144265	0.699897	0.0380708	0.699897	0.0999489	0.115342	2.69002e-06	0.213954	0.699897	0.522565	0	0.907453	0.130807	0.164594	NA	0.409831	0.0489359	0.747205	0.699897	0.699897	0.164594	0.415999
Parabacteroides distasonis	0.447097	0.409831	0.821383	0.0148876	0.962771	0.00520901	0.409831	0.409831	0.0969743	0.0969743	0.409831	0.00287977	0.0969743	0.00564406	0.0969743	0.69395	0.950196	0.0507361	0.70913	0.0969743	0.652311	0.409831	0.745758	0.415999	0.0384247	0.409831	NA	0.883461	0.00520901	0.0969743	0.0969743	0.0234872	0.857752
Phocaeicola dorei	0.904373	0.0489359	0.00794804	0.821383	0.755859	0.00609966	0.0489359	0.0489359	0.401557	0.578962	0.0489359	0.997886	0.578962	0.0162003	0.578962	0.00229314	0.00909288	0.131102	0.0338857	0.578962	0.447097	0.0489359	0.022052	0.243002	0.180569	0.0489359	0.883461	NA	0.00609966	0.578962	0.578962	0.448221	0.0295926
Prevotella lascolaii	0.0987065	0.747205	0.0157016	0.206177	0.213954	0	0.747205	0.747205	0.243002	0.107236	0.747205	0.0969743	0.107236	0.699897	0.107236	0.0164205	0.0316939	0.734523	0.0108942	0.107236	0.187343	0.747205	0.0175191	0.00392127	0.122545	0.747205	0.00520901	0.00609966	NA	0.107236	0.107236	0.0175191	0.00520901
Providencia rettgeri	0.000962241	0.699897	0.000175567	2.29565e-08	0.447097	0.107236	0.699897	0.699897	2.87835e-06	0	0.699897	4.77975e-06	0	0.00181155	0	0.000272813	0.000151061	0.280731	2.87835e-06	0	0.121734	0.699897	0.00391941	0.00909288	0.699897	0.699897	0.0969743	0.578962	0.107236	NA	0	0.623627	0.130807
Robinsoniella sp900539655	0.000962241	0.699897	0.000175567	2.29565e-08	0.447097	0.107236	0.699897	0.699897	2.87835e-06	0	0.699897	4.77975e-06	0	0.00181155	0	0.000272813	0.000151061	0.280731	2.87835e-06	0	0.121734	0.699897	0.00391941	0.00909288	0.699897	0.699897	0.0969743	0.578962	0.107236	0	NA	0.623627	0.130807
UMGS1663 sp900753245	0.0276691	0.164594	0.905151	0.705753	0.409831	0.0175191	0.164594	0.164594	0.821383	0.623627	0.164594	0.0847156	0.623627	0.0134727	0.623627	0.821383	0.753289	0.0865955	0.880835	0.623627	0.669228	0.164594	0.986009	0.0999489	0.839972	0.164594	0.0234872	0.448221	0.0175191	0.623627	0.623627	NA	0.786288
UMGS75 sp900538885	0.411259	0.415999	0.000100311	0.951218	0.00184558	0.00520901	0.415999	0.415999	0.974783	0.130807	0.415999	0.650379	0.130807	0.974783	0.130807	0.00118409	0.000347495	0.824121	0.00046753	0.130807	4.77975e-06	0.415999	1.38947e-09	9.2928e-08	0.574385	0.415999	0.857752	0.0295926	0.00520901	0.130807	0.130807	0.786288	NA
q-values+42:77
	Atopobium minutum	Bacteroides acidifaciens	Bacteroides cellulosilyticus	Bacteroides fragilis	Bacteroides ovatus	Bacteroides salyersiae	Bacteroides sp900765785	Bacteroides sp902362375	Bacteroides thetaiotaomicron	Bacteroides uniformis	Bacteroides xylanisolvens	CAG-269 sp900556945	Citrobacter_B koseri	Eggerthella lenta	Escherichia albertii	Escherichia coli_D	Escherichia fergusonii	Eubacterium callanderi	F0422 sp003999875	Finegoldia magna_H	Gordonibacter pamelaeae	HGM11788 sp900760465	Methanobrevibacter smithii	Cand. M. intestini	MGYG000001195	MGYG000002717	Parabacteroides distasonis	Phocaeicola dorei	Prevotella lascolaii	Providencia rettgeri	Robinsoniella sp900539655	UMGS1663 sp900753245	UMGS75 sp900538885
Atopobium minutum	1	-0.0973729	0.170959	0.357778	-0.142222	0.730297	-0.0973729	-0.0973729	0.112514	0.632924	-0.0973729	0.162893	0.632924	0.213272	0.632924	0.0647952	0.112514	-0.142222	0.270021	0.632924	-0.0973729	-0.0973729	-0.189185	-0.109932	-0.0973729	-0.0973729	0.393781	-0.0973729	0.730297	0.632924	0.632924	0.330026	0.142478
Bacteroides acidifaciens	-0.0973729	1	-0.170251	-0.0973729	0.730297	-0.0666667	1	1	-0.147167	-0.0666667	1	-0.147167	-0.0666667	0.331126	-0.0666667	-0.216025	-0.147167	0.632924	-0.123247	-0.0666667	-0.0666667	1	-0.196039	0.196039	-0.0666667	1	-0.123247	-0.0666667	-0.0666667	-0.0666667	-0.0666667	-0.123247	-0.193084
Bacteroides cellulosilyticus	0.170959	-0.170251	1	0.170959	0.124334	-0.170251	-0.170251	-0.170251	0.1104	0.442653	-0.170251	-0.0587236	0.442653	-0.0164426	0.442653	0.531975	0.627168	-0.248668	0.828828	0.442653	0.510754	-0.170251	-0.411239	0.482759	0.306452	-0.170251	0.272779	-0.170251	-0.170251	0.442653	0.442653	-0.0944235	-0.493093
Bacteroides fragilis	0.357778	-0.0973729	0.170959	1	-0.142222	-0.0973729	-0.0973729	-0.0973729	0.654931	0.632924	-0.0973729	0.70531	0.632924	0.213272	0.632924	0.0647952	0.112514	-0.142222	0.270021	0.632924	-0.0973729	-0.0973729	-0.145723	-0.153393	-0.0973729	-0.0973729	-0.180014	-0.0973729	-0.0973729	0.632924	0.632924	-0.180014	0.192418
Bacteroides ovatus	-0.142222	0.730297	0.124334	-0.142222	1	-0.0973729	0.730297	0.730297	-0.214952	-0.0973729	0.730297	-0.214952	-0.0973729	0.156176	-0.0973729	0.0225374	0.162893	0.424444	0.213767	-0.0973729	-0.0973729	0.730297	-0.247985	0.36303	-0.0973729	0.730297	0.213767	-0.0973729	-0.0973729	-0.0973729	-0.0973729	-0.180014	-0.282018
Bacteroides salyersiae	0.730297	-0.0666667	-0.170251	-0.0973729	-0.0973729	1	-0.0666667	-0.0666667	-0.147167	-0.0666667	-0.0666667	-0.147167	-0.0666667	-0.147167	-0.0666667	-0.216025	-0.147167	-0.0973729	-0.123247	-0.0666667	-0.0666667	-0.0666667	0.0280056	-0.364073	-0.0666667	-0.0666667	0.616236	-0.0666667	1	-0.0666667	-0.0666667	0.534071	0.353988
Bacteroides sp900765785	-0.0973729	1	-0.170251	-0.0973729	0.730297	-0.0666667	1	1	-0.147167	-0.0666667	1	-0.147167	-0.0666667	0.331126	-0.0666667	-0.216025	-0.147167	0.632924	-0.123247	-0.0666667	-0.0666667	1	-0.196039	0.196039	-0.0666667	1	-0.123247	-0.0666667	-0.0666667	-0.0666667	-0.0666667	-0.123247	-0.193084
Bacteroides sp902362375	-0.0973729	1	-0.170251	-0.0973729	0.730297	-0.0666667	1	1	-0.147167	-0.0666667	1	-0.147167	-0.0666667	0.331126	-0.0666667	-0.216025	-0.147167	0.632924	-0.123247	-0.0666667	-0.0666667	1	-0.196039	0.196039	-0.0666667	1	-0.123247	-0.0666667	-0.0666667	-0.0666667	-0.0666667	-0.123247	-0.193084
Bacteroides thetaiotaomicron	0.112514	-0.147167	0.1104	0.654931	-0.214952	-0.147167	-0.147167	-0.147167	1	0.331126	-0.147167	0.380711	0.331126	-0.0444162	0.331126	-0.0681252	-0.110406	-0.214952	0.0226724	0.331126	-0.147167	-0.147167	-0.123645	-0.08887	-0.147167	-0.147167	-0.272069	-0.147167	-0.147167	0.331126	0.331126	0.0255065	-0.0255297
Bacteroides uniformis	0.632924	-0.0666667	0.442653	0.632924	-0.0973729	-0.0666667	-0.0666667	-0.0666667	0.331126	1	-0.0666667	0.40471	1	0.478294	1	0.339467	0.331126	-0.0973729	0.534071	1	-0.0666667	-0.0666667	-0.308062	0.25205	-0.0666667	-0.0666667	-0.123247	-0.0666667	-0.0666667	1	1	-0.123247	-0.193084
Bacteroides xylanisolvens	-0.0973729	1	-0.170251	-0.0973729	0.730297	-0.0666667	1	1	-0.147167	-0.0666667	1	-0.147167	-0.0666667	0.331126	-0.0666667	-0.216025	-0.147167	0.632924	-0.123247	-0.0666667	-0.0666667	1	-0.196039	0.196039	-0.0666667	1	-0.123247	-0.0666667	-0.0666667	-0.0666667	-0.0666667	-0.123247	-0.193084
CAG-269 sp900556945	0.162893	-0.147167	-0.0587236	0.70531	-0.214952	-0.147167	-0.147167	-0.147167	0.380711	0.40471	-0.147167	1	0.40471	0.408629	0.40471	0.00425783	-0.0774112	0.156176	0.0680173	0.40471	-0.147167	-0.147167	-0.00193196	-0.0656865	-0.147167	-0.147167	-0.272069	-0.147167	-0.147167	0.40471	0.40471	-0.272069	0.378506
Citrobacter_B koseri	0.632924	-0.0666667	0.442653	0.632924	-0.0973729	-0.0666667	-0.0666667	-0.0666667	0.331126	1	-0.0666667	0.40471	1	0.478294	1	0.339467	0.331126	-0.0973729	0.534071	1	-0.0666667	-0.0666667	-0.308062	0.25205	-0.0666667	-0.0666667	-0.123247	-0.0666667	-0.0666667	1	1	-0.123247	-0.193084
Eggerthella lenta	0.213272	0.331126	-0.0164426	0.213272	0.156176	-0.147167	0.331126	0.331126	-0.0444162	0.478294	0.331126	0.408629	0.478294	1	0.478294	-0.151153	-0.0444162	0.112514	0.113362	0.478294	-0.147167	0.331126	0.0482989	0.181604	-0.147167	0.331126	-0.272069	0.40471	-0.147167	0.478294	0.478294	-0.272069	0.197578
Escherichia albertii	0.632924	-0.0666667	0.442653	0.632924	-0.0973729	-0.0666667	-0.0666667	-0.0666667	0.331126	1	-0.0666667	0.40471	1	0.478294	1	0.339467	0.331126	-0.0973729	0.534071	1	-0.0666667	-0.0666667	-0.308062	0.25205	-0.0666667	-0.0666667	-0.123247	-0.0666667	-0.0666667	1	1	-0.123247	-0.193084
Escherichia coli_D	0.0647952	-0.216025	0.531975	0.0647952	0.0225374	-0.216025	-0.216025	-0.216025	-0.0681252	0.339467	-0.216025	0.00425783	0.339467	-0.151153	0.339467	1	0.830276	0.0197203	0.637085	0.339467	0.401189	-0.216025	-0.492635	0.217148	-0.216025	-0.216025	-0.133122	-0.216025	-0.216025	0.339467	0.339467	0.237718	-0.314694
Escherichia fergusonii	0.112514	-0.147167	0.627168	0.112514	0.162893	-0.147167	-0.147167	-0.147167	-0.110406	0.331126	-0.147167	-0.0774112	0.331126	-0.0444162	0.331126	0.830276	1	-0.214952	0.804872	0.331126	0.551877	-0.147167	-0.425031	0.179672	-0.147167	-0.147167	0.0255065	-0.147167	-0.147167	0.331126	0.331126	0.161541	-0.426235
Eubacterium callanderi	-0.142222	0.632924	-0.248668	-0.142222	0.424444	-0.0973729	0.632924	0.632924	-0.214952	-0.0973729	0.632924	0.156176	-0.0973729	0.112514	-0.0973729	0.0197203	-0.214952	1	-0.180014	-0.0973729	-0.0973729	0.632924	-0.15595	0.242872	-0.0973729	0.632924	-0.180014	-0.0973729	-0.0973729	-0.0973729	-0.0973729	-0.180014	-0.00734421
F0422 sp003999875	0.270021	-0.123247	0.828828	0.270021	0.213767	-0.123247	-0.123247	-0.123247	0.0226724	0.534071	-0.123247	0.0680173	0.534071	0.113362	0.534071	0.637085	0.804872	-0.180014	1	0.534071	0.616236	-0.123247	-0.440081	0.379677	-0.123247	-0.123247	0.0822785	-0.123247	-0.123247	0.534071	0.534071	-0.227848	-0.356957
Finegoldia magna_H	0.632924	-0.0666667	0.442653	0.632924	-0.0973729	-0.0666667	-0.0666667	-0.0666667	0.331126	1	-0.0666667	0.40471	1	0.478294	1	0.339467	0.331126	-0.0973729	0.534071	1	-0.0666667	-0.0666667	-0.308062	0.25205	-0.0666667	-0.0666667	-0.123247	-0.0666667	-0.0666667	1	1	-0.123247	-0.193084
Gordonibacter pamelaeae	-0.0973729	-0.0666667	0.510754	-0.0973729	-0.0973729	-0.0666667	-0.0666667	-0.0666667	-0.147167	-0.0666667	-0.0666667	-0.147167	-0.0666667	-0.147167	-0.0666667	0.401189	0.551877	-0.0973729	0.616236	-0.0666667	1	-0.0666667	-0.25205	0.0840168	-0.0666667	-0.0666667	-0.123247	-0.0666667	-0.0666667	-0.0666667	-0.0666667	-0.123247	-0.193084
HGM11788 sp900760465	-0.0973729	1	-0.170251	-0.0973729	0.730297	-0.0666667	1	1	-0.147167	-0.0666667	1	-0.147167	-0.0666667	0.331126	-0.0666667	-0.216025	-0.147167	0.632924	-0.123247	-0.0666667	-0.0666667	1	-0.196039	0.196039	-0.0666667	1	-0.123247	-0.0666667	-0.0666667	-0.0666667	-0.0666667	-0.123247	-0.193084
Methanobrevibacter smithii	-0.189185	-0.196039	-0.411239	-0.145723	-0.247985	0.0280056	-0.196039	-0.196039	-0.123645	-0.308062	-0.196039	-0.00193196	-0.308062	0.0482989	-0.308062	-0.492635	-0.425031	-0.15595	-0.440081	-0.308062	-0.25205	-0.196039	1	-0.655882	0.308062	-0.196039	0.13375	0.364073	0.0280056	-0.308062	-0.308062	-0.237298	0.424146
Cand. M. intestini	-0.109932	0.196039	0.482759	-0.153393	0.36303	-0.364073	0.196039	0.196039	-0.08887	0.25205	0.196039	-0.0656865	0.25205	0.181604	0.25205	0.217148	0.179672	0.242872	0.379677	0.25205	0.0840168	0.196039	-0.655882	1	-0.0280056	0.196039	-0.103548	-0.140028	-0.364073	0.25205	0.25205	-0.202782	-0.598198
MGYG000001195	-0.0973729	-0.0666667	0.306452	-0.0973729	-0.0973729	-0.0666667	-0.0666667	-0.0666667	-0.147167	-0.0666667	-0.0666667	-0.147167	-0.0666667	-0.147167	-0.0666667	-0.216025	-0.147167	-0.0973729	-0.123247	-0.0666667	-0.0666667	-0.0666667	0.308062	-0.0280056	1	-0.0666667	0.534071	-0.0666667	-0.0666667	-0.0666667	-0.0666667	-0.123247	-0.193084
MGYG000002717	-0.0973729	1	-0.170251	-0.0973729	0.730297	-0.0666667	1	1	-0.147167	-0.0666667	1	-0.147167	-0.0666667	0.331126	-0.0666667	-0.216025	-0.147167	0.632924	-0.123247	-0.0666667	-0.0666667	1	-0.196039	0.196039	-0.0666667	1	-0.123247	-0.0666667	-0.0666667	-0.0666667	-0.0666667	-0.123247	-0.193084
Parabacteroides distasonis	0.393781	-0.123247	0.272779	-0.180014	0.213767	0.616236	-0.123247	-0.123247	-0.272069	-0.123247	-0.123247	-0.272069	-0.123247	-0.272069	-0.123247	-0.133122	0.0255065	-0.180014	0.0822785	-0.123247	-0.123247	-0.123247	0.13375	-0.103548	0.534071	-0.123247	1	-0.123247	0.616236	-0.123247	-0.123247	0.227848	0.0223098
Phocaeicola dorei	-0.0973729	-0.0666667	-0.170251	-0.0973729	-0.0973729	-0.0666667	-0.0666667	-0.0666667	-0.147167	-0.0666667	-0.0666667	-0.147167	-0.0666667	0.40471	-0.0666667	-0.216025	-0.147167	-0.0973729	-0.123247	-0.0666667	-0.0666667	-0.0666667	0.364073	-0.140028	-0.0666667	-0.0666667	-0.123247	1	-0.0666667	-0.0666667	-0.0666667	-0.123247	0.482711
Prevotella lascolaii	0.730297	-0.0666667	-0.170251	-0.0973729	-0.0973729	1	-0.0666667	-0.0666667	-0.147167	-0.0666667	-0.0666667	-0.147167	-0.0666667	-0.147167	-0.0666667	-0.216025	-0.147167	-0.0973729	-0.123247	-0.0666667	-0.0666667	-0.0666667	0.0280056	-0.364073	-0.0666667	-0.0666667	0.616236	-0.0666667	1	-0.0666667	-0.0666667	0.534071	0.353988
Providencia rettgeri	0.632924	-0.0666667	0.442653	0.632924	-0.0973729	-0.0666667	-0.0666667	-0.0666667	0.331126	1	-0.0666667	0.40471	1	0.478294	1	0.339467	0.331126	-0.0973729	0.534071	1	-0.0666667	-0.0666667	-0.308062	0.25205	-0.0666667	-0.0666667	-0.123247	-0.0666667	-0.0666667	1	1	-0.123247	-0.193084
Robinsoniella sp900539655	0.632924	-0.0666667	0.442653	0.632924	-0.0973729	-0.0666667	-0.0666667	-0.0666667	0.331126	1	-0.0666667	0.40471	1	0.478294	1	0.339467	0.331126	-0.0973729	0.534071	1	-0.0666667	-0.0666667	-0.308062	0.25205	-0.0666667	-0.0666667	-0.123247	-0.0666667	-0.0666667	1	1	-0.123247	-0.193084
UMGS1663 sp900753245	0.330026	-0.123247	-0.0944235	-0.180014	-0.180014	0.534071	-0.123247	-0.123247	0.0255065	-0.123247	-0.123247	-0.272069	-0.123247	-0.272069	-0.123247	0.237718	0.161541	-0.180014	-0.227848	-0.123247	-0.123247	-0.123247	-0.237298	-0.202782	-0.123247	-0.123247	0.227848	-0.123247	0.534071	-0.123247	-0.123247	1	-0.0198309
UMGS75 sp900538885	0.142478	-0.193084	-0.493093	0.192418	-0.282018	0.353988	-0.193084	-0.193084	-0.0255297	-0.193084	-0.193084	0.378506	-0.193084	0.197578	-0.193084	-0.314694	-0.426235	-0.00734421	-0.356957	-0.193084	-0.193084	-0.193084	0.424146	-0.598198	-0.193084	-0.193084	0.0223098	0.482711	0.353988	-0.193084	-0.193084	-0.0198309	1

## Sheet: Supplementary Table S5
Supplementary Table S5: Recovered genomes, their classification according to GTDB, completeness and contamination.
The classification Methanobrevibacter_A smithii_A refers to Cand. M. intestini.
Genome	Classification	Completeness_General	Contamination	Coding_Density	Contig_N50	Average_Gene_Length	Genome_Size	GC_Content	Total_Coding_Sequences
P15_MpT1_BT	d__Archaea;p__Methanobacteriota;c__Methanobacteria;o__Methanobacteriales;f__Methanobacteriaceae;g__Methanobrevibacter_A;s__Methanobrevibacter_A smithii	95.26	15.31	0.865	85571	247.06387	3147256	0.45	3695
P15_MS_BT	d__Archaea;p__Methanobacteriota;c__Methanobacteria;o__Methanobacteriales;f__Methanobacteriaceae;g__Methanobrevibacter_A;s__Methanobrevibacter_A smithii	92.79	4.79	0.882	1870817	275.396796	2040764	0.32	2185
P20_MS_BT	d__Archaea;p__Methanobacteriota;c__Methanobacteria;o__Methanobacteriales;f__Methanobacteriaceae;g__Methanobrevibacter_A;s__Methanobrevibacter_A smithii	92.28	0.33	0.882	1802126	287.114971	1991374	0.32	2044
P31_MS_BT	d__Archaea;p__Methanobacteriota;c__Methanobacteria;o__Methanobacteriales;f__Methanobacteriaceae;g__Methanobrevibacter_A;s__Methanobrevibacter_A smithii	97.85	0.57	0.896	1523163	297.595457	1839168	0.31	1849
P32_MS_BT	d__Archaea;p__Methanobacteriota;c__Methanobacteria;o__Methanobacteriales;f__Methanobacteriaceae;g__Methanobrevibacter_A;s__Methanobrevibacter_A smithii	97.81	0.24	0.886	587618	300.145121	2047584	0.32	2019
P32_MS_BT_DS	d__Archaea;p__Methanobacteriota;c__Methanobacteria;o__Methanobacteriales;f__Methanobacteriaceae;g__Methanobrevibacter_A;s__Methanobrevibacter_A smithii	97.8	1.03	0.0.893	1862516	299.106	1862516	0.31	1857
P45_MS_BT	d__Archaea;p__Methanobacteriota;c__Methanobacteria;o__Methanobacteriales;f__Methanobacteriaceae;g__Methanobrevibacter_A;s__Methanobrevibacter_A smithii_A	97.25	4.34	0.881	1191016	288.633476	2067117	0.31	2109
P46_MpT1_BT	d__Archaea;p__Methanobacteriota;c__Methanobacteria;o__Methanobacteriales;f__Methanobacteriaceae;g__Methanobrevibacter_A;s__Methanobrevibacter_A smithii_A	92.48	7.84	0.872	332276	269.727135	2436010	0.32	2635
P48_MpT1_BT	d__Archaea;p__Methanobacteriota;c__Methanobacteria;o__Methanobacteriales;f__Methanobacteriaceae;g__Methanobrevibacter_A;s__Methanobrevibacter_A smithii	95.15	0.12	0.884	1817258	284.057477	1973989	0.34	2053
P51_MS_BT	d__Archaea;p__Methanobacteriota;c__Methanobacteria;o__Methanobacteriales;f__Methanobacteriaceae;g__Methanobrevibacter_A;s__Methanobrevibacter_A smithii_A	61.26	7.44	0.842	64731	224.501464	2986639	0.42	3757
P61_MpT1	d__Archaea;p__Methanobacteriota;c__Methanobacteria;o__Methanobacteriales;f__Methanobacteriaceae;g__Methanobrevibacter_A;s__Methanobrevibacter_A smithii	96.32	4.35	0.871	341931	262.490265	2821054	0.36	3133
P66_MS_BT	d__Archaea;p__Methanobacteriota;c__Methanobacteria;o__Methanobacteriales;f__Methanobacteriaceae;g__Methanobrevibacter_A;s__Methanobrevibacter_A smithii_A	96.55	35.6	0.879	241467	273.298372	2971054	0.31	3194
P82_MpT1	d__Archaea;p__Methanobacteriota;c__Methanobacteria;o__Methanobacteriales;f__Methanobacteriaceae;g__Methanobrevibacter_A;s__Methanobrevibacter_A smithii_A	66.84	4.79	0.854	85208	239.229814	2692962	0.42	3220
P86_MS	d__Archaea;p__Methanobacteriota;c__Methanobacteria;o__Methanobacteriales;f__Methanobacteriaceae;g__Methanobrevibacter_A;s__Methanobrevibacter_A smithii	95.1	0.23	0.889	1301241	293.62099	1817283	0.31	1839
P86_MS_BT	d__Archaea;p__Methanobacteriota;c__Methanobacteria;o__Methanobacteriales;f__Methanobacteriaceae;g__Methanobrevibacter_A;s__Methanobrevibacter_A smithii_A	97.18	2.59	0.896	1214561	312.911883	2076911	0.31	1986
P86_MS_BT_DS	d__Archaea;p__Methanobacteriota;c__Methanobacteria;o__Methanobacteriales;f__Methanobacteriaceae;g__Methanobrevibacter_A;s__Methanobrevibacter_A smithii_A	100	0.72	0.0.897	1372777	309.837	2029211	0.3	1961
P86_MS_DS	d__Archaea;p__Methanobacteriota;c__Methanobacteria;o__Methanobacteriales;f__Methanobacteriaceae;g__Methanobrevibacter_A;s__Methanobrevibacter_A smithii	99.26	0.85	0.9	1651367	307.822	1817523	0.31	1774
P88_MS	d__Archaea;p__Methanobacteriota;c__Methanobacteria;o__Methanobacteriales;f__Methanobacteriaceae;g__Methanobrevibacter_A;s__Methanobrevibacter_A smithii	91.25	5.93	0.887	1239495	271.730137	2007034	0.33	2190
P89_MS	d__Archaea;p__Methanobacteriota;c__Methanobacteria;o__Methanobacteriales;f__Methanobacteriaceae;g__Methanobrevibacter_A;s__Methanobrevibacter_A smithii_A	94.89	0.92	0.896	582183	307.249491	2017222	0.3	1964

## Sheet: Supplementary Table S6
Supplementary Table S6: List of Methanobrevibacter genomes
Name	Type	Taxonomic species	Reference	Reference_2
GUT_GENOME066320	MAG	Methanobrevibacter intestini	Chibani et al. 2022
GUT_GENOME067559	MAG	Methanobrevibacter intestini	Chibani et al. 2022
GUT_GENOME092268	MAG	Methanobrevibacter intestini	Chibani et al. 2022
GUT_GENOME092376	MAG	Methanobrevibacter intestini	Chibani et al. 2022
GUT_GENOME094058	MAG	Methanobrevibacter intestini	Chibani et al. 2022
GUT_GENOME103665	MAG	Methanobrevibacter intestini	Chibani et al. 2022
GUT_GENOME104028	MAG	Methanobrevibacter intestini	Chibani et al. 2022
GUT_GENOME104378	MAG	Methanobrevibacter intestini	Chibani et al. 2022
GUT_GENOME109037	MAG	Methanobrevibacter intestini	Chibani et al. 2022
GUT_GENOME143185	Culture (WWM 1085)	Methanobrevibacter intestini	Chibani et al. 2022	Jennings et al., 2017
GUT_GENOME186606	MAG	Methanobrevibacter intestini	Chibani et al. 2022
GUT_GENOME239080	MAG	Methanobrevibacter intestini	Chibani et al. 2022
GUT_GENOME251364	MAG	Methanobrevibacter intestini	Chibani et al. 2022
GUT_GENOME258505	MAG	Methanobrevibacter intestini	Chibani et al. 2022
GUT_GENOME272533	MAG	Methanobrevibacter intestini	Chibani et al. 2022
GUT_GENOME284192	MAG	Methanobrevibacter intestini	Chibani et al. 2022
GUT_GENOME285252	MAG	Methanobrevibacter intestini	Chibani et al. 2022
P45_consensus	Culture	Methanobrevibacter intestini	This study
P46_consensus	Culture	Methanobrevibacter intestini	This study
P51_consensus	Culture	Methanobrevibacter intestini	This study
P66_consensus	Culture	Methanobrevibacter intestini	This study
P82_consensus	Culture	Methanobrevibacter intestini	This study
P86_BT_consensus	Culture	Methanobrevibacter intestini	This study
P89_consensus	Culture	Methanobrevibacter intestini	This study
VRP86_MS_Bt_consensus	Culture	Methanobrevibacter intestini	This study
GUT_GENOME011239	MAG	Methanobrevibacter smithii	Chibani et al. 2022
GUT_GENOME011714	MAG	Methanobrevibacter smithii	Chibani et al. 2022
GUT_GENOME012603	MAG	Methanobrevibacter smithii	Chibani et al. 2022
GUT_GENOME018608	MAG	Methanobrevibacter smithii	Chibani et al. 2022
GUT_GENOME018729	MAG	Methanobrevibacter smithii	Chibani et al. 2022
GUT_GENOME091220	MAG	Methanobrevibacter smithii	Chibani et al. 2022
GUT_GENOME093513	MAG	Methanobrevibacter smithii	Chibani et al. 2022
GUT_GENOME120881	MAG	Methanobrevibacter smithii	Chibani et al. 2022
GUT_GENOME130816	MAG	Methanobrevibacter smithii	Chibani et al. 2022
GUT_GENOME132205	Culture (DSM2374)	Methanobrevibacter smithii	Chibani et al. 2022	Miller et al., 1982
GUT_GENOME137479	MAG	Methanobrevibacter smithii	Chibani et al. 2022
GUT_GENOME163069	MAG	Methanobrevibacter smithii	Chibani et al. 2022
GUT_GENOME235276	MAG	Methanobrevibacter smithii	Chibani et al. 2022
GUT_GENOME268176	MAG	Methanobrevibacter smithii	Chibani et al. 2022
GUT_GENOME270563	MAG	Methanobrevibacter smithii	Chibani et al. 2022
GUT_GENOME283326	MAG	Methanobrevibacter smithii	Chibani et al. 2022
P15MS_consensus	Culture	Methanobrevibacter smithii	This study
P20_consensus	Culture	Methanobrevibacter smithii	This study
P31_consensus	Culture	Methanobrevibacter smithii	This study
P32_consensus	Culture	Methanobrevibacter smithii	This study
P48_consensus	Culture	Methanobrevibacter smithii	This study
P61_consensus	Culture	Methanobrevibacter smithii	This study
P86_sans_C_consensus	Culture	Methanobrevibacter smithii	This study
P88_consensus	Culture	Methanobrevibacter smithii	This study
VRP32_MS_Bt_consensus	Culture	Methanobrevibacter smithii	This study
VRP86_MS_sans_C_consensus	Culture	Methanobrevibacter smithii	This study
Chibani, C.M., Mahnert, A., Borrel, G., Almeida, A., Werner, A., Brugère, J.F., Gribaldo, S., Finn, R.D., Schmitz, R.A. and Moissl-Eichinger, C., 2022. A catalogue of 1,167 genomes from the human gut archaeome. Nature Microbiology, 7(1), pp.48-61.
Jennings ME, Chia N, Boardman LA, Metcalf WW. 2017. Draft Genome Sequence of Methanobrevibacter smithii Isolate WWM1085, Obtained from a Human Stool Sample. Genome Announc 5:10.1128/genomea.01055-17.
Miller T.L., Wolin M.J., Conway de Macario E. and Macario A.J.L. (1982) Isolation of Methanobrevibacter smithii from human feces. Appl.Environ.Microbiol. 43: 227-232. http://www.ncbi.nlm.nih.gov/pubmed/6798932

## Sheet: Supplementary Table S7
Supplementary Table S7: ANI Matrix
	M.smithii (DSM2374)	M. intestini (WWM1085)	P15MS_consensus	P15_MpT1_consensus	P20_consensus	P31_consensus	P32_consensus	P45_consensus	P46_consensus	P51_consensus	P48_consensus	P61_consensus	P66_consensus	P82MpT1_sans_C_consensus	P82_consensus	P86_BT_consensus	P86_sans_C_consensus	P88_consensus	P89_consensus	VRP32_MS_Bt_consensus	VRP86_MS_Bt_consensus	VRP86_MS_sans_C_consensus
GUT_GENOME011239	0.0168262	0.0779357	0.0125482	0.0134594	0.0124685	0.0155633	0.0140911	0.0743098	0.074837	0.076422	0.0129666	0.0144025	0.034608	0.0787037	0.0788576	0.0784288	0.0151231	0.0141659	0.0786322	0.0141619	0.077676	0.0149787
GUT_GENOME011714	0.0200669	0.0786618	0.0152381	0.0161918	0.0154213	0.019019	0.0164295	0.0749929	0.0754082	0.075932	0.0160919	0.0177532	0.0373758	0.0789009	0.0795183	0.0779338	0.0182848	0.0175581	0.0785494	0.0167757	0.0779023	0.0188183
GUT_GENOME012603	0.0197125	0.0783365	0.0148829	0.0160811	0.0149284	0.0180469	0.0164725	0.0738469	0.074723	0.0753548	0.0153284	0.0177697	0.0360323	0.0783708	0.0783528	0.0773348	0.0173098	0.0167369	0.0783389	0.0171874	0.0780451	0.0181891
GUT_GENOME014311	0.214311	0.218344	0.21626	0.221054	0.218649	0.214985	0.216992	0.217339	0.218042	0.219647	0.216521	0.215779	0.220719	0.216275	0.217308	0.21561	0.217336	0.216545	0.216345	0.214423	0.215856	0.216625
GUT_GENOME018608	0.0167567	0.0772433	0.0158832	0.0169721	0.0153233	0.0172519	0.0131052	0.0737915	0.0746981	0.0762908	0.0152379	0.0131212	0.0367025	0.0770992	0.0784492	0.0766409	0.0174866	0.0132605	0.0760628	0.0122052	0.0761798	0.0177017
GUT_GENOME018729	0.020509	0.0772126	0.0159792	0.0170466	0.0158083	0.018946	0.0181765	0.0741425	0.0753048	0.074995	0.016063	0.0182469	0.0367326	0.0764691	0.0781188	0.076677	0.0184515	0.0178961	0.0774135	0.0180693	0.0769337	0.0183839
GUT_GENOME029117	0.212928	0.213451	0.214468	0.216268	0.212305	0.213277	0.212167	0.213594	0.215771	0.214655	0.212341	0.215026	0.215744	0.212539	0.210993	0.212336	0.211008	0.213121	0.212406	0.211963	0.213371	0.213913
GUT_GENOME066320	0.0651692	0.0128708	0.0726683	0.0745076	0.0723243	0.0670464	0.0721013	0.0128149	0.0131335	0.0159595	0.0734382	0.0745306	0.0200203	0.0149075	0.0150374	0.0137851	0.0692354	0.0732468	0.0137815	0.072651	0.0134582	0.0674177
GUT_GENOME067559	0.0664017	0.0115731	0.0730286	0.0742293	0.072235	0.0679545	0.0713603	0.0146801	0.0150959	0.0165118	0.0733982	0.0736749	0.0183383	0.0112772	0.0134866	0.0116091	0.0690208	0.0732589	0.0114168	0.071456	0.0109899	0.0684797
GUT_GENOME091220	0.0121271	0.074692	0.00940569	0.0111745	0.00860373	0.00845548	0.0139516	0.0701646	0.0707394	0.070211	0.0097011	0.0143324	0.0298389	0.0733265	0.0735061	0.0717103	0.0105092	0.0152632	0.0720374	0.0147069	0.0711449	0.00795052
GUT_GENOME092268	0.0688707	0.00966827	0.0775107	0.0784238	0.0768163	0.07093	0.0770485	0.012297	0.0123982	0.0150206	0.0779316	0.0773136	0.0199156	0.0124311	0.0135903	0.0121033	0.0720097	0.0768097	0.0124637	0.07759	0.012443	0.0702795
GUT_GENOME092376	0.0680303	0.0118181	0.0750577	0.0769562	0.0749203	0.0709308	0.0742461	0.0130336	0.0131127	0.0158514	0.0758802	0.074827	0.0176918	0.0133481	0.0125152	0.0101963	0.0729477	0.0753209	0.0103138	0.074312	0.01035	0.0702106
GUT_GENOME093513	0.0140014	0.0790319	0.0106198	0.0116679	0.0108318	0.0138284	0.0121715	0.0747646	0.0750928	0.074445	0.0111619	0.0112494	0.0339322	0.0783371	0.076727	0.0783657	0.0126428	0.0113753	0.0786944	0.0112591	0.0781666	0.013269
GUT_GENOME094058	0.0681453	0.0111516	0.0754088	0.0765839	0.0746372	0.0698587	0.0754363	0.0135431	0.0133957	0.0158768	0.0755723	0.0755691	0.0190502	0.0127296	0.014349	0.0118618	0.0717356	0.0755329	0.0119718	0.07558	0.0120259	0.0692754
GUT_GENOME103665	0.0682861	0.0108005	0.0752361	0.0762914	0.074197	0.0712657	0.0740091	0.0119759	0.0123831	0.0158272	0.0758887	0.0747481	0.0185652	0.0106931	0.0124813	0.0102255	0.0715534	0.0747326	0.0104926	0.0740809	0.0105643	0.0705173
GUT_GENOME104028	0.0669891	0.0108409	0.0739983	0.0749752	0.0738716	0.0698107	0.0727415	0.0126399	0.012809	0.0152809	0.0743516	0.0739854	0.0181825	0.0123685	0.0153717	0.0110115	0.0712852	0.073976	0.0118	0.0729669	0.0114063	0.0692897
GUT_GENOME104378	0.0685249	0.0118455	0.074146	0.0747384	0.074338	0.0704574	0.0733471	0.0132227	0.0125929	0.0156512	0.0749456	0.0753039	0.0182906	0.0120716	0.0149923	0.0101992	0.0711087	0.0759991	0.0108168	0.0726785	0.011298	0.0705456
GUT_GENOME109037	0.0685526	0.0105638	0.0738575	0.0740268	0.07247	0.070242	0.0725029	0.0124306	0.0133	0.0172413	0.0737025	0.0742129	0.0175892	0.0113122	0.0129093	0.0104399	0.0709525	0.0739219	0.0104804	0.0724671	0.0101549	0.0699103
GUT_GENOME120881	0.0141528	0.0788559	0.0137107	0.0152002	0.0133874	0.0160165	0.0102824	0.0754509	0.0752941	0.0750232	0.0134126	0.00993929	0.0355668	0.0768321	0.0774628	0.0768362	0.0163227	0.0102254	0.0779554	0.0099626	0.0781914	0.0173018
GUT_GENOME130816	0.0138245	0.0705322	0.0171647	0.0186608	0.0161283	0.0143333	0.0174774	0.0666728	0.066654	0.067271	0.0176798	0.019019	0.0330723	0.0680707	0.0678635	0.0682554	0.0156427	0.0178392	0.0692895	0.0172613	0.0686237	0.0140764
GUT_GENOME132204	0.208459	0.206727	0.207728	0.209441	0.209044	0.208453	0.208879	0.207359	0.208734	0.208166	0.209511	0.206954	0.209641	0.207096	0.206397	0.2071	0.209048	0.210602	0.208933	0.208882	0.207469	0.20699
GUT_GENOME132205	0	0.0695556	0.016224	0.0179517	0.0158832	0.0134072	0.0140765	0.0670511	0.0673276	0.0663283	0.0168898	0.0145483	0.0326447	0.0687098	0.0691043	0.0701345	0.014048	0.0141131	0.069811	0.0148497	0.0699629	0.0130204
GUT_GENOME132206	0.249959	0.258389	0.248347	0.25032	0.251317	0.243293	0.247417	0.246455	0.254302	0.245029	0.248284	0.243305	0.258505	0.258504	0.9	0.245438	0.248656	0.252421	0.246178	0.239681	0.257359	0.24299
GUT_GENOME137479	0.0135081	0.0713542	0.0169029	0.0175682	0.0178498	0.0144518	0.0166965	0.0672121	0.0677042	0.0683276	0.0173787	0.0176887	0.0347698	0.071411	0.0700495	0.0714413	0.0159923	0.0176708	0.0720916	0.017996	0.071043	0.0142357
GUT_GENOME143185	0.0695556	0	0.077572	0.0795294	0.0781197	0.0722225	0.0759837	0.0109365	0.0114127	0.013303	0.0785485	0.0786325	0.0199532	0.0121104	0.01242	0.0115373	0.0748952	0.076875	0.0110957	0.077204	0.0115428	0.0730324
GUT_GENOME163069	0.0218436	0.0792976	0.0189107	0.0198734	0.0178112	0.0211487	0.0197873	0.0764643	0.077001	0.0772828	0.0188536	0.0203966	0.038653	0.079851	0.0802761	0.0780432	0.0205633	0.0195624	0.0782761	0.019773	0.0784629	0.0208287
GUT_GENOME186606	0.0692449	0.0113747	0.0740427	0.0760553	0.0752609	0.0721076	0.0740523	0.01289	0.0129565	0.0150868	0.0747924	0.0747981	0.0187659	0.011929	0.012272	0.0110318	0.0725407	0.0758429	0.0111009	0.0738578	0.0108717	0.0706739
GUT_GENOME235276	0.0180889	0.0781236	0.0131635	0.0144616	0.0129607	0.0164694	0.0145191	0.074704	0.0754152	0.0753423	0.0135551	0.0158431	0.0354898	0.0770822	0.0793007	0.0783077	0.0150782	0.0144984	0.0785715	0.0151771	0.0778282	0.015722
GUT_GENOME236870	0.217007	0.216569	0.215468	0.217815	0.215892	0.217253	0.215345	0.214653	0.216973	0.217797	0.216944	0.21558	0.218499	0.21682	0.216004	0.215972	0.214986	0.21607	0.217232	0.214753	0.214994	0.215623
GUT_GENOME239080	0.0701602	0.0109229	0.0785593	0.0787648	0.0775404	0.0727621	0.0758929	0.0130244	0.0132101	0.0148531	0.0771751	0.0772021	0.0198276	0.0116948	0.0128291	0.0106575	0.0737496	0.0782654	0.0110786	0.076603	0.0108148	0.0724724
GUT_GENOME251364	0.069584	0.0101215	0.0769032	0.0773882	0.076886	0.0729072	0.0765666	0.0125479	0.013151	0.0158573	0.0773094	0.0772968	0.0162947	0.011309	0.0119513	0.00833151	0.074074	0.0771052	0.00860634	0.0767265	0.00824493	0.0711982
GUT_GENOME258505	0.0663526	0.0125237	0.075569	0.0766443	0.0745586	0.0692433	0.0737958	0.0136363	0.0140904	0.0170307	0.0746038	0.075105	0.0202284	0.0132805	0.0147602	0.0133343	0.0710846	0.0757008	0.0134895	0.0737502	0.0132618	0.06857
GUT_GENOME263468	0.209511	0.207743	0.210073	0.21316	0.210425	0.209001	0.211842	0.207753	0.21069	0.209235	0.209743	0.210542	0.212177	0.209034	0.209944	0.208386	0.20953	0.210069	0.208918	0.21018	0.207797	0.211144
GUT_GENOME264147	0.213286	0.212844	0.213535	0.214984	0.214467	0.210997	0.21134	0.212328	0.216192	0.213149	0.214177	0.214435	0.215483	0.213567	0.212311	0.213736	0.213758	0.212957	0.212847	0.213605	0.212799	0.214147
GUT_GENOME268176	0.0179488	0.0774833	0.0124102	0.0133839	0.0119848	0.0153929	0.0148219	0.0752919	0.0750261	0.0754278	0.0125487	0.0156709	0.0361598	0.0770863	0.0758944	0.0773132	0.0146125	0.0157094	0.0782111	0.0144906	0.0772688	0.0153762
GUT_GENOME270563	0.0212747	0.0746866	0.0179732	0.0192173	0.0175002	0.0185583	0.0208618	0.0700172	0.0709814	0.0734686	0.0184025	0.0221171	0.0374747	0.0726341	0.073538	0.0725127	0.0174952	0.0219826	0.0728716	0.0210581	0.0727688	0.0183037
GUT_GENOME272533	0.0680542	0.011088	0.0745046	0.0747188	0.0738579	0.0698982	0.0731658	0.0127416	0.0130898	0.016045	0.0764327	0.0742961	0.0193414	0.0133576	0.0159607	0.0115118	0.0708117	0.0747224	0.0121665	0.0732498	0.0118999	0.0705999
GUT_GENOME273277	0.9	0.9	0.9	0.9	0.9	0.9	0.9	0.9	0.9	0.9	0.9	0.9	0.9	0.9	0.9	0.9	0.9	0.9	0.9	0.9	0.9	0.9
GUT_GENOME280023	0.9	0.9	0.9	0.9	0.9	0.9	0.9	0.9	0.9	0.9	0.9	0.9	0.9	0.9	0.9	0.9	0.9	0.9	0.9	0.9	0.9	0.9
GUT_GENOME283178	0.9	0.9	0.9	0.9	0.9	0.9	0.9	0.9	0.9	0.9	0.9	0.9	0.9	0.9	0.9	0.9	0.9	0.9	0.9	0.9	0.9	0.283869
GUT_GENOME283326	0.0166159	0.0785168	0.0153983	0.0165802	0.0144713	0.0176517	0.0122453	0.0757877	0.0759949	0.0756928	0.014925	0.0121299	0.0363307	0.075926	0.0770193	0.0764931	0.0174914	0.0132058	0.0771596	0.0118158	0.0764676	0.018977
GUT_GENOME284192	0.0660153	0.0147932	0.0713613	0.0722649	0.0704257	0.0676132	0.071516	0.016215	0.0157211	0.0179262	0.0714107	0.0707293	0.0202828	0.0158919	0.0183044	0.0140551	0.0698362	0.0711932	0.0137727	0.0712717	0.0140218	0.0680509
GUT_GENOME285252	0.0660745	0.0121643	0.0717472	0.0727529	0.0707021	0.06799	0.0700614	0.014058	0.0136074	0.0173025	0.0710291	0.0723632	0.0200136	0.0136628	0.0129031	0.0135341	0.0696807	0.0712283	0.0138727	0.0703199	0.0135887	0.0683252
GUT_GENOME287004	0.236959	0.242576	0.233268	0.239324	0.237501	0.232503	0.237822	0.243108	0.241032	0.238327	0.233079	0.237069	0.240281	0.243103	0.242206	0.242242	0.2363	0.237534	0.237644	0.233383	0.242937	0.230829
P15MS_consensus	0.016224	0.077572	0	0.00214723	0.00516604	0.00736108	0.0144312	0.0758691	0.0756478	0.07598	0.00548575	0.0145491	0.0291828	0.0779676	0.0789558	0.0777754	0.0078875	0.0135986	0.0778672	0.0139475	0.0774118	0.00791283
P15_MpT1_consensus	0.0179517	0.0795294	0.00214723	0	0.00638036	0.00922249	0.0154811	0.0761407	0.076998	0.0777524	0.00665764	0.0155891	0.0314186	0.0787936	0.0742685	0.078295	0.00940699	0.0150177	0.078672	0.0150278	0.0788253	0.00940379
P20_consensus	0.0158832	0.0781197	0.00516604	0.00638036	0	0.00759188	0.0136428	0.0742998	0.0744165	0.075068	0.00524594	0.0133977	0.0297814	0.0784761	0.0778614	0.0763044	0.00753088	0.0135433	0.0760937	0.0131859	0.0760224	0.008149
P31_consensus	0.0134072	0.0722225	0.00736108	0.00922249	0.00759188	0	0.017489	0.0691224	0.0707001	0.0709022	0.00871386	0.017796	0.0308996	0.0727292	0.0724052	0.073292	0.00646586	0.0155016	0.0738796	0.0170231	0.0723083	0.000384223
P32_consensus	0.0140765	0.0759837	0.0144312	0.0154811	0.0136428	0.017489	0	0.0733771	0.0742757	0.0737786	0.0138738	0.0090098	0.0357398	0.075379	0.0749116	0.0767024	0.0177924	0.0102605	0.0761996	0.000398586	0.0766155	0.0174008
P48_consensus	0.0168898	0.0785485	0.00548575	0.00665764	0.00524594	0.00871386	0.0138738	0.0757943	0.0757574	0.0765918	0	0.0140363	0.0299754	0.0774378	0.0783304	0.0784832	0.0080039	0.0131742	0.078202	0.013463	0.0775141	0.00830204
P46_consensus	0.0673276	0.0114127	0.0756478	0.076998	0.0744165	0.0707001	0.0742757	0.0011027	0	0.00351209	0.0757574	0.0753383	0.0183568	0.0144579	0.0171343	0.0121022	0.0704837	0.0756184	0.0125234	0.0745026	0.0128801	0.069049
P45_consensus	0.0670511	0.0109365	0.0758691	0.0761407	0.0742998	0.0691224	0.0733771	0	0.0011027	0.00285043	0.0757943	0.0757057	0.0183723	0.0139218	0.016894	0.0116844	0.070847	0.075285	0.0121107	0.0738799	0.0126695	0.0700178
P51_consensus	0.0663283	0.013303	0.07598	0.0777524	0.075068	0.0709022	0.0737786	0.00285043	0.00351209	0	0.0765918	0.0757226	0.0195527	0.0162511	0.0134266	0.0149678	0.0727354	0.0732789	0.0151246	0.0746671	0.0148883	0.0702344
P66_consensus	0.0326447	0.0199532	0.0291828	0.0314186	0.0297814	0.0308996	0.0357398	0.0183723	0.0183568	0.0195527	0.0299754	0.0358546	0	0.0192191	0.0215523	0.00841391	0.0317097	0.0370439	0.00856898	0.0352491	0.00816562	0.0298791
P61_consensus	0.0145483	0.0786325	0.0145491	0.0155891	0.0133977	0.017796	0.0090098	0.0757057	0.0753383	0.0757226	0.0140363	0	0.0358546	0.0772999	0.0769514	0.0763226	0.0179713	0.00931481	0.0766943	0.00890222	0.0769992	0.0176626
P82MpT1_sans_C_consensus	0.0687098	0.0121104	0.0779676	0.0787936	0.0784761	0.0727292	0.075379	0.0139218	0.0144579	0.0162511	0.0774378	0.0772999	0.0192191	0	0.00296645	0.0114511	0.0736523	0.0789281	0.0119417	0.0766559	0.0114997	0.0736144
P82_consensus	0.0691043	0.01242	0.0789558	0.0742685	0.0778614	0.0724052	0.0749116	0.016894	0.0171343	0.0134266	0.0783304	0.0769514	0.0215523	0.00296645	0	0.0124433	0.0732394	0.0764873	0.0129656	0.0778431	0.0130005	0.0720132
P86_BT_consensus	0.0701345	0.0115373	0.0777754	0.078295	0.0763044	0.073292	0.0767024	0.0116844	0.0121022	0.0149678	0.0784832	0.0763226	0.00841391	0.0114511	0.0124433	0	0.0748092	0.0787496	0.000453684	0.0771035	0.000365017	0.0720532
P86_sans_C_consensus	0.014048	0.0748952	0.0078875	0.00940699	0.00753088	0.00646586	0.0177924	0.070847	0.0704837	0.0727354	0.0080039	0.0179713	0.0317097	0.0736523	0.0732394	0.0748092	0	0.0166756	0.0752838	0.0170722	0.0745489	0.00621189
P88_consensus	0.0141131	0.076875	0.0135986	0.0150177	0.0135433	0.0155016	0.0102605	0.075285	0.0756184	0.0732789	0.0131742	0.00931481	0.0370439	0.0789281	0.0764873	0.0787496	0.0166756	0	0.0787419	0.0101195	0.078446	0.0166597
P89_consensus	0.069811	0.0110957	0.0778672	0.078672	0.0760937	0.0738796	0.0761996	0.0121107	0.0125234	0.0151246	0.078202	0.0766943	0.00856898	0.0119417	0.0129656	0.000453684	0.0752838	0.0787419	0	0.0769655	0.000493895	0.0733472
VRP32_MS_Bt_consensus	0.0148497	0.077204	0.0139475	0.0150278	0.0131859	0.0170231	0.000398586	0.0738799	0.0745026	0.0746671	0.013463	0.00890222	0.0352491	0.0766559	0.0778431	0.0771035	0.0170722	0.0101195	0.0769655	0	0.076387	0.0175539
VRP86_MS_Bt_consensus	0.0699629	0.0115428	0.0774118	0.0788253	0.0760224	0.0723083	0.0766155	0.0126695	0.0128801	0.0148883	0.0775141	0.0769992	0.00816562	0.0114997	0.0130005	0.000365017	0.0745489	0.078446	0.000493895	0.076387	0	0.0734034
VRP86_MS_sans_C_consensus	0.0130204	0.0730324	0.00791283	0.00940379	0.008149	0.000384223	0.0174008	0.0700178	0.069049	0.0702344	0.00830204	0.0176626	0.0298791	0.0736144	0.0720132	0.0720532	0.00621189	0.0166597	0.0733472	0.0175539	0.0734034	0

## Sheet: Supplementary Table S8
Supplementary Table S8: ANI distances from different clusters to themselves and Candidatus M. intestini (CMI, WWM1085) and M. smithii (MS, DSM2374).
	CMI	MS	MIC-1	MIC-2	MIC-3	MIC-4	MS-1	MS-2	MS-3	MS-4	MS-5
CMI	na	7	1.1	1.2	1.1-1.3	2	7.9	7.9	7.7	7.8-7.9	7.2-7.5
MS	7	na	0.07	6.9	6.6-6.7	3.3	1.4	1.5	1.4	1.6-1.7	1.3-1.4
MIC-1	1.1-1.2	0.07	na	1.1-1.	1.2-1.5	0.8-0.9	7.6-7.7	7.6-7.7	7.8-7.9	7.6-7.8	7.2-7.5
MIC-2	1.2	6.9	1.1-1.3	na	1.3-1.7	1.9-2.2	7.5	7.7	7.6-7.6	7.7-7.9	7.2-7.4
MIC-3	1.1-1.3	6.6-6.7	1.2-1.5	1.3-1.7	na	1.8-2.0	7.4-7.4	7.5-7.6	7.3-7.6	7.4-7.7	6.9-7.3
MIC-4	2	3.3	0.8-0.9	1.9-2.2	1.8-2.0	na	3.6	3.6	3.7	2.9-3.0	3.0-3.2
MS-1	7.9	1.4	7.6-7.7	7.5	7.4-7.4	3.6	na	0.9	0.1	1.4	1.7-1.8
MS-2	7.9	1.5	7.6-7.7	7.7	7.5-7.6	3.6	0.9	na	0.9	1.3-1.5	1.8
MS-3	7.7	1.4	7.8-7.9	7.6-7.6	7.3-7.6	3.7	0.1	0.9	na	1.3-1.4	1.6-1.7
MS-4	7.8-7.9	1.6-1.7	7.6-7.8	7.7-7.9	7.4-7.7	2.9-3.0	1.4	1.3-1.5	1.3-1.4	na	0.7-0.9
MS-5	7.2-7.5	1.3-1.4	7.2-7.5	7.2-7.4	6.9-7.3	3.0-3.2	1.7-1.8	1.8	1.6-1.7	0.7-0.9	na

## Sheet: Supplementary Table S9
Supplementary Table S9: Kbase annotation output on CRISPR Functions for M. smithii (left table) and Cand. M. intestini (right table)
Family	Function	protein Coding gene count	genomes				Family	Function	protein Coding gene count	genomes
smithii_GUT_GENOME018729.fa_assembly.RAST.CDS.514	CRISPR-associated endoribonuclease Cas6	10	10				intestini_GUT_GENOME109037.fa_assembly.RAST.CDS.1217	CRISPR-associated protein, Csm1 family	9	9
smithii_P20_consensus.fasta_assembly.RAST.CDS.198	CRISPR-associated protein Cas02710	9	9				intestini_GUT_GENOME109037.fa_assembly.RAST.CDS.1215	CRISPR-associated RAMP Csm3	9	9
smithii_P20_consensus.fasta_assembly.RAST.CDS.186	CRISPR-associated protein, Csm1 family	12	12				intestini_GUT_GENOME109037.fa_assembly.RAST.CDS.1216	CRISPR-associated protein, Csm2 family	8	8
smithii_P20_consensus.fasta_assembly.RAST.CDS.423	CRISPR-associated protein Cas1	4	4				intestini_GUT_GENOME109037.fa_assembly.RAST.CDS.1213	CRISPR-associated protein, Csm5 family	8	8
smithii_P20_consensus.fasta_assembly.RAST.CDS.187	CRISPR-associated protein, Csm2 family	4	4				intestini_GUT_GENOME109037.fa_assembly.RAST.CDS.1929	CRISPR-associated protein Cas1	1	1
smithii_P20_consensus.fasta_assembly.RAST.CDS.197	CRISPR-associated protein Cas1	41	22				intestini_GUT_GENOME109037.fa_assembly.RAST.CDS.1209	CRISPR-associated protein Cas1	10	10
smithii_P20_consensus.fasta_assembly.RAST.CDS.422	CRISPR-associated protein Cas2	4	4				intestini_GUT_GENOME109037.fa_assembly.RAST.CDS.1601	CRISPR-associated protein Cas1	17	13
smithii_P20_consensus.fasta_assembly.RAST.CDS.188	CRISPR-associated RAMP Csm3	11	10				intestini_GUT_GENOME092376.fa_assembly.RAST.CDS.1604	CRISPR-associated protein Cas02710	10	7
smithii_P20_consensus.fasta_assembly.RAST.CDS.425	CRISPR-associated helicase Cas3	1	1				intestini_GUT_GENOME092376.fa_assembly.RAST.CDS.1593	CRISPR-associated protein, Csm2 family	1	1
smithii_P20_consensus.fasta_assembly.RAST.CDS.428	CRISPR-associated protein, Csd2/Csh2 family	1	1				intestini_GUT_GENOME239080.fa_assembly.RAST.CDS.838	CRISPR-associated protein Cas1	5	5
smithii_P20_consensus.fasta_assembly.RAST.CDS.424	CRISPR-associated RecB family exonuclease Cas4	4	4				intestini_GUT_GENOME239080.fa_assembly.RAST.CDS.836	CRISPR-associated helicase Cas3	1	1
smithii_P32_consensus.fasta_assembly.RAST.CDS.159	CRISPR-associated protein, Csm2 family	6	6				intestini_GUT_GENOME239080.fa_assembly.RAST.CDS.831	CRISPR-associated endoribonuclease Cas6	8	8
smithii_P32_consensus.fasta_assembly.RAST.CDS.156	CRISPR-associated protein, Csm5 family	6	6				intestini_GUT_GENOME239080.fa_assembly.RAST.CDS.839	CRISPR-associated protein Cas2	5	5
smithii_GUT_GENOME137479.fa_assembly.RAST.CDS.1171	CRISPR-associated negative autoregulator Cas7/Cst2	3	3				intestini_GUT_GENOME239080.fa_assembly.RAST.CDS.837	CRISPR-associated RecB family exonuclease Cas4	5	5
smithii_GUT_GENOME137479.fa_assembly.RAST.CDS.1172	CRISPR-associated protein Cas5	3	3				intestini_GUT_GENOME092268.fa_assembly.RAST.CDS.1786	CRISPR-associated negative autoregulator Cas7/Cst2	2	2
smithii_GUT_GENOME137479.fa_assembly.RAST.CDS.1173	CRISPR-associated helicase Cas3	3	3				intestini_GUT_GENOME092268.fa_assembly.RAST.CDS.1785	CRISPR-associated protein Cas5	2	2
smithii_GUT_GENOME137479.fa_assembly.RAST.CDS.1170	CRISPR-associated protein, Cst1 family	3	3				intestini_GUT_GENOME092268.fa_assembly.RAST.CDS.1784	CRISPR-associated helicase Cas3	2	2
smithii_GUT_GENOME283326.fa_assembly.RAST.CDS.936	CRISPR-associated helicase Cas3	1	1				intestini_GUT_GENOME092268.fa_assembly.RAST.CDS.1787	CRISPR-associated protein, Cst1 family	2	2
smithii_GUT_GENOME283326.fa_assembly.RAST.CDS.938	CRISPR-associated protein, Csd2/Csh2 family	1	1				intestini_GUT_GENOME092268.fa_assembly.RAST.CDS.157	CRISPR-associated protein Cas1	1	1
smithii_GUT_GENOME283326.fa_assembly.RAST.CDS.934	CRISPR-associated protein Cas1	1	1				intestini_GUT_GENOME143185.fa_assembly.RAST.CDS.1790	CRISPR-associated protein Cas5	3	3
smithii_GUT_GENOME283326.fa_assembly.RAST.CDS.937	CRISPR-associated protein Cas5	1	1				intestini_GUT_GENOME143185.fa_assembly.RAST.CDS.1789	CRISPR-associated helicase Cas3	4	3
smithii_GUT_GENOME283326.fa_assembly.RAST.CDS.935	CRISPR-associated RecB family exonuclease Cas4	1	1				intestini_GUT_GENOME143185.fa_assembly.RAST.CDS.1791	CRISPR-associated protein, Csd2/Csh2 family	4	3
smithii_GUT_GENOME283326.fa_assembly.RAST.CDS.940	CRISPR-associated endoribonuclease Cas6	1	1				intestini_GUT_GENOME251364.fa_assembly.RAST.CDS.330	CRISPR-associated helicase Cas3	1	1
smithii_GUT_GENOME283326.fa_assembly.RAST.CDS.933	CRISPR-associated protein Cas2	1	1				intestini_GUT_GENOME251364.fa_assembly.RAST.CDS.332	CRISPR-associated protein, Csd2/Csh2 family	1	1
							intestini_GUT_GENOME251364.fa_assembly.RAST.CDS.328	CRISPR-associated protein Cas1	1	1
							intestini_GUT_GENOME251364.fa_assembly.RAST.CDS.331	CRISPR-associated protein Cas5	1	1
							intestini_GUT_GENOME251364.fa_assembly.RAST.CDS.329	CRISPR-associated RecB family exonuclease Cas4	1	1
							intestini_GUT_GENOME251364.fa_assembly.RAST.CDS.334	CRISPR-associated endoribonuclease Cas6	1	1
							intestini_GUT_GENOME251364.fa_assembly.RAST.CDS.327	CRISPR-associated protein Cas2	1	1
							intestini_GUT_GENOME103665.fa_assembly.RAST.CDS.1500	CRISPR-associated protein, Cse1 family	2	1
							intestini_GUT_GENOME103665.fa_assembly.RAST.CDS.1453	CRISPR-associated protein Cas2; DEDDh 3'-5' exonuclease domain	1	1
							intestini_GUT_GENOME103665.fa_assembly.RAST.CDS.1501	CRISPR-associated helicase Cas3	1	1
							intestini_GUT_GENOME103665.fa_assembly.RAST.CDS.1454	CRISPR-associated protein Cas1	1	1
							intestini_GUT_GENOME103665.fa_assembly.RAST.CDS.1457	CRISPR-associated protein, Cas5e family	1	1
							intestini_GUT_GENOME103665.fa_assembly.RAST.CDS.1455	CRISPR-associated protein, Cse3 family	1	1

[truncated: 1 more sheets: Supplementary Table S10]
